# Supplementary material
Source: PubMed Central journal article supplement (PMC3607229)
Supplement: NIHMS52461-supplement-01.pdf [file NIHMS52461-supplement-01.pdf]

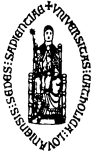

**Data Supplement**  
**Within-Subject Blood Pressure Level – Not Variability –  
Predicts Fatal and Nonfatal Outcomes in a General Population**

Short title: Outcome and Blood Pressure Variability

Rudolph Schutte, Lutgarde Thijs, Yan-Ping Liu, Kei Asayama, Yu Jin, Augustine Odili,  
Yu-Mei Gu, Tatiana Kuznetsova, Lotte Jacobs, Jan A. Staessen

Tables 5, Figures 2

**Correspondence to:**

Jan A. Staessen, MD, PhD,  
Studies Coordinating Centre,  
Laboratory of Hypertension,  
University of Leuven,  
Campus Sint Rafaël,  
Kapucijnenvoer 35, Block D, Box 7001,  
BE-3000 Leuven, Belgium

Telephone: +32-16-34-7104 (office)  
+32-15-41-1747 (home)  
+32-47-632-4928 (mobile)  
Facsimile: +32-16-34-7106 (office)  
+32-15-41-4542 (home)

Email: [jan.staessen@med.kuleuven.be](mailto:jan.staessen@med.kuleuven.be)  
[ja.staessen@maastrichtuniversity.nl](mailto:ja.staessen@maastrichtuniversity.nl)

From the Department of Cardiovascular Sciences, Studies Coordinating Centre, Division of Hypertension and Cardiovascular Rehabilitation, University of Leuven, Leuven, Belgium (R.S., L.T., Y.-P.L., K.A., Y.J., A.O., Y.-M.G., T.K., L.J., J.A.S.); Department of Physiology, Hypertension in Africa Research Team, North-West University, Potchefstroom, South Africa (R.S.); Tohoku University Graduate School of Pharmaceutical Sciences, Sendai, Japan (K.A.); Department of Internal Medicine, College of Health Science, University of Abuja, Nigeria (A.O.); Department of Epidemiology, Maastricht University, Maastricht, the Netherlands (J.A.S).

Correspondence to Prof Jan A. Staessen, Studies Coordinating Centre, Division of Hypertension and Cardiovascular Rehabilitation, Department of Cardiovascular Diseases, University of Leuven, Campus Sint Rafaël, Kapucijnenvoer 35, Block D, Box 7001, BE-3000 Leuven, Belgium.

E-mail: [jan.staessen@med.kuleuven.be](mailto:jan.staessen@med.kuleuven.be) or [ja.staessen@maastrichtuniversity.nl](mailto:ja.staessen@maastrichtuniversity.nl)

**Table S1: Variability by Quartiles of Mean Systolic Blood Pressure**

| Characteristic                   | Categories of mean systolic blood pressure level |               |               |                | P       |
|----------------------------------|--------------------------------------------------|---------------|---------------|----------------|---------|
| <b>Limits</b>                    |                                                  |               |               |                |         |
| Women                            | 92.4–111.2                                       | 111.3–119.4   | 119.6–130.4   | 130.6–198.2    |         |
| Men                              | 97.4–118.6                                       | 118.6–125.8   | 125.8–135.4   | 135.4–204.2    |         |
| <b>Number of subjects</b>        | 746                                              | 733           | 730           | 735            |         |
| <b>Overall variability</b>       |                                                  |               |               |                |         |
| VIM (units)                      | 5.50 (2.84)                                      | 5.33 (2.61)†  | 5.42 (2.86)   | 5.56 (2.95)    | 0.58    |
| MMD (mm Hg)                      | 12.93 (6.45)                                     | 14.33 (6.74)‡ | 16.02 (7.79)§ | 20.26 (10.11)§ | <0.0001 |
| ARV (mm Hg)                      | 3.59 (1.73)                                      | 3.81 (1.79)*  | 3.99 (1.83)   | 4.93 (2.49)§   | <0.0001 |
| <b>Within visit variability</b>  |                                                  |               |               |                |         |
| VIM (units)                      | 3.63 (1.75)                                      | 3.44 (1.62)*  | 3.33 (1.51)   | 3.48 (1.80)    | 0.037   |
| MMD (mm Hg)                      | 7.28 (3.60)                                      | 7.55 (3.83)*  | 8.20 (3.96)*  | 10.43 (5.78)§  | <0.0001 |
| ARV (mm Hg)                      | 5.22 (1.64)                                      | 3.35 (1.72)   | 3.45 (1.72)   | 4.24 (2.36)§   | <0.0001 |
| <b>Between visit variability</b> |                                                  |               |               |                |         |
| VIM (units)                      | 4.75 (4.21)                                      | 4.79 (3.91)   | 5.08 (4.27)   | 5.07 (4.29)    | 0.067   |
| MMD (mm Hg)                      | 5.33 (4.74)                                      | 6.17 (5.06)†  | 7.36 (6.20)‡  | 9.33 (8.00)§   | <0.0001 |

Values are arithmetic means (SD). Systolic blood pressure was based on 10 blood pressure readings, i.e., 5 consecutive blood pressure readings at each of 2 home visits at an interval of 2-4 weeks. VIM, MMD and ARV indicate variability independent of the mean, the difference between maximum and minimum blood pressure and average real variability, respectively. ARV for between visit variability is the same as MMD and is therefore not presented.

P-values are for linear trend across categories of systolic blood pressure level.

P-values for difference with adjacent lower quartile: \*  $P \leq 0.05$ ; †  $P \leq 0.01$ ; ‡  $P \leq 0.001$ ; and §  $P \leq 0.0001$ .

**Table S2: Correlates of the Within- and Between Visit Systolic Variability in 2944 Participants**

| Label                                           | Within visit    |                 |                 | Between visits |                |
|-------------------------------------------------|-----------------|-----------------|-----------------|----------------|----------------|
|                                                 | VIM (units)     | MMD (mm Hg)     | ARV (mm Hg)     | VIM (units)    | MMD (mm Hg)    |
| <b>Variance explained</b>                       |                 |                 |                 |                |                |
| Total                                           | 0.292           | 0.368           | 0.372           | 0.019          | 0.089          |
| Pedigree                                        | 0.258           | 0.248           | 0.287           | 0.011          | 0.012          |
| Fixed effects                                   | 0.034           | 0.120           | 0.086           | 0.009          | 0.078          |
| <b>Parameter estimates (<math>\pm</math>SE)</b> |                 |                 |                 |                |                |
| Age (+10 years)                                 | 0.148 (0.022)§  | 0.354 (0.057)§  | 0.128 (0.024)§  | ...            | ...            |
| Body mass index (+5 kg/m <sup>2</sup> )         | -0.135 (0.037)‡ | -0.328 (0.096)† | -0.118 (0.041)† | 0.139 (0.050)† | 0.211 (0.081)† |
| Systolic blood pressure (+10 mm Hg)             | -0.051 (0.022)* | 0.877 (0.056)§  | 0.293 (0.024)§  | ...            | 0.895 (0.083)§ |
| Heart rate (+5 beats per minute)                | 0.068 (0.017)§  | 0.155 (0.043)‡  | 0.061 (0.018)‡  | 2.189 (0.744)† | 3.968 (1.088)‡ |
| Total/HDL cholesterol (+1 unit)                 | -0.063 (0.018)‡ | -0.162 (0.046)‡ | -0.083 (0.020)§ | 0.732 (0.313)* | 1.268 (0.462)† |
| Plasma glucose (+1 mmol/l)                      | 0.048 (0.022)*  | 0.112 (0.058)   | 0.053 (0.024)*  | ...            | ...            |
| Serum creatinine (+10 $\mu$ mol/l)              | -0.050 (0.017)† | -0.166 (0.045)‡ | -0.061 (0.019)† | ...            | ...            |
| Treated with $\beta$ -blockers                  | 0.287 (0.123)*  | 0.745 (0.317)*  | ...             | ...            | ...            |
| Treated with diuretics                          | -0.278 (0.134)* | -0.853 (0.344)* | ...             | ...            | ...            |

Systolic blood pressure was based on 10 blood pressure readings, i.e., 5 consecutive blood pressure readings at each of 2 home visits at an interval of 2-4 weeks. VIM, MMD and ARV indicate variability independent of the mean, the difference between maximum and minimum blood pressure and average real variability, respectively. ARV for between visit variability is the same as MMD and is therefore not presented. The following variables were not related to any index of variability: energy expenditure in physical activity, triglycerides, serum potassium, history of cardiovascular disease, current smoking and alcohol intake, diabetes, and classes of antihypertensive drugs other than diuretics and  $\beta$ -blockers. Significance of the parameter estimates: \*  $P \leq 0.05$ ; †  $P \leq 0.01$ ; ‡  $P \leq 0.001$ ; and §  $P \leq 0.0001$ .

**Table S3: Adjusted Standardized Hazard Ratios for Endpoints in Relation to the Mean and Within Visit Variability of Systolic Pressure**

| Endpoint<br>(number)         | Basic model       |                    | Full model       |                    |                  |                    |                  |                    |
|------------------------------|-------------------|--------------------|------------------|--------------------|------------------|--------------------|------------------|--------------------|
|                              | Mean SBP          |                    | VIM              |                    | MMD              |                    | ARV              |                    |
|                              | HR (95% CI)       | R <sup>2</sup> (%) | HR (95% CI)      | R <sup>2</sup> (%) | HR (95% CI)      | R <sup>2</sup> (%) | HR (95% CI)      | R <sup>2</sup> (%) |
| <b>Mortality</b>             |                   |                    |                  |                    |                  |                    |                  |                    |
| Total (401)                  | 1.18 (1.08–1.30)‡ | 28.6               | 0.95 (0.86–1.05) | <0.01              | 0.97 (0.88–1.06) | <0.01              | 0.98 (0.89–1.07) | <0.01              |
| Cardiovascular (164)         | 1.37 (1.18–1.59)§ | 18.4               | 0.97 (0.84–1.13) | <0.01              | 0.99 (0.87–1.14) | <0.01              | 0.98 (0.85–1.12) | <0.01              |
| Cardiac (112)                | 1.44 (1.22–1.70)§ | 13.5               | 0.95 (0.79–1.13) | <0.01              | 0.96 (0.81–1.13) | <0.01              | 0.98 (0.83–1.15) | <0.01              |
| <b>Cardiovascular events</b> |                   |                    |                  |                    |                  |                    |                  |                    |
| All (311)                    | 1.25 (1.12–1.40)‡ | 16.8               | 1.07 (0.97–1.18) | <0.01              | 1.08 (0.98–1.18) | <0.01              | 1.04 (0.95–1.15) | <0.01              |
| Cardiac (164)                | 1.29 (1.13–1.46)‡ | 12.4               | 1.06 (0.95–1.19) | 0.10               | 1.07 (0.96–1.19) | 0.10               | 1.05 (0.94–1.17) | 0.10               |
| Coronary (133)               | 1.21 (1.03–1.41)* | 8.5                | 1.04 (0.90–1.20) | <0.10              | 1.06 (0.92–1.22) | <0.01              | 0.99 (0.85–1.15) | <0.01              |
| Stroke (49)                  | 1.44 (1.04–1.98)* | 4.9                | 1.09 (0.84–1.43) | <0.01              | 1.12 (0.88–1.44) | <0.01              | 0.96 (0.71–1.29) | <0.01              |

Systolic blood pressure (SBP) level and variability were based on 10 blood pressure readings, i.e., 5 consecutive blood pressure readings at each of 2 home visits, 2-4 weeks apart. VIM, MMD and ARV indicate variability independent of the mean, the difference between maximum and minimum blood pressure and average real variability, respectively. The basic model accounts for relatedness and includes in addition to mean SBP, sex, age, body mass index, heart rate, smoking and drinking, total-to-HDL serum cholesterol ratio, plasma glucose, history of cardiovascular disease and use of  $\beta$ -blockers accounts as covariables. Full models include the aforementioned covariables and both mean SBP and an index of SBP variability. Hazard ratios (HR) given with 95% confidence interval (CI) express the risk associated with a 1-SD increase in the explanatory variables: 15.6 mm Hg for level of blood pressure and 2.82 units, 8.36 mm Hg, 2.05 mm Hg for VIM, MMD and ARV, respectively. The R<sup>2</sup> statistic is a measure for the risk prediction provided by the basic model including mean SBP and the additive contribution of the indexes of variability.

The cause of death was renal in 6 cases and unknown in 31 cases.

Significance of the hazard ratios: \*  $P \leq 0.05$ ; †  $P \leq 0.01$ ; ‡  $P \leq 0.001$ ; and §  $P \leq 0.0001$ .

**Table S4: Adjusted Standardized Hazard Ratios for Endpoints in Relation to the Mean and Between Visit Variability of Systolic Pressure**

| Endpoint<br>(number)         | Basic model       |                    | Full model       |                    |                  |                    |
|------------------------------|-------------------|--------------------|------------------|--------------------|------------------|--------------------|
|                              | Mean SBP          |                    | VIM              |                    | MMD              |                    |
|                              | HR (95% CI)       | R <sup>2</sup> (%) | HR (95% CI)      | R <sup>2</sup> (%) | HR (95% CI)      | R <sup>2</sup> (%) |
| <b>Mortality</b>             |                   |                    |                  |                    |                  |                    |
| Total (401)                  | 1.18 (1.08–1.30)‡ | 28.6               | 1.02 (0.93–1.12) | <0.01              | 1.02 (0.94–1.11) | <0.01              |
| Cardiovascular (164)         | 1.37 (1.18–1.59)§ | 18.4               | 1.14 (0.99–1.30) | 0.10               | 1.11 (0.98–1.25) | <0.01              |
| Cardiac (112)                | 1.44 (1.22–1.70)§ | 13.5               | 1.09 (0.93–1.29) | <0.01              | 1.08 (0.93–1.24) | <0.01              |
| <b>Cardiovascular events</b> |                   |                    |                  |                    |                  |                    |
| All (311)                    | 1.25 (1.12–1.40)‡ | 16.8               | 1.03 (0.94–1.13) | <0.01              | 1.03 (0.95–1.13) | <0.01              |
| Cardiac (164)                | 1.29 (1.13–1.46)‡ | 12.4               | 1.01 (0.90–1.14) | <0.01              | 1.02 (0.91–1.13) | <0.01              |
| Coronary (133)               | 1.21 (1.03–1.41)* | 8.5                | 0.92 (0.78–1.08) | 0.10               | 0.92 (0.79–1.07) | <0.01              |
| Stroke (49)                  | 1.44 (1.04–1.98)* | 4.9                | 1.14 (0.89–1.45) | <0.01              | 1.09 (0.89–1.35) | <0.01              |

Systolic blood pressure (SBP) level and variability were based on 10 blood pressure readings, i.e., 5 consecutive blood pressure readings at each of 2 home visits, 2-4 weeks apart. VIM, MMD and ARV indicate variability independent of the mean, the difference between maximum and minimum blood pressure and average real variability, respectively. The basic model accounts for relatedness and includes in addition to mean SBP, sex, age, body mass index, heart rate, smoking and drinking, total-to-HDL serum cholesterol ratio, plasma glucose, history of cardiovascular disease and use of  $\beta$ -blockers accounts as covariables. Full models include the aforementioned covariables and both mean SBP and an index of SBP variability. Hazard ratios (HR) given with 95% confidence interval (CI) express the risk associated with a 1-SD increase in the explanatory variables: 15.6 mm Hg for level of blood pressure and 2.82 units, 8.36 mm Hg, 2.05 mm Hg for VIM, MMD and ARV, respectively. The R<sup>2</sup> statistic is a measure for the risk prediction provided by the basic model including mean SBP and the additive contribution of the indexes of variability.

The cause of death was renal in 6 cases and unknown in 31 cases.

Significance of the hazard ratios: \*  $P \leq 0.05$ ; †  $P \leq 0.01$ ; ‡  $P \leq 0.001$ ; and §  $P \leq 0.0001$ .

**Table S5: Adjusted Standardized Hazard Ratios for Total Mortality and All Cardiovascular Events in Relation to Mean and Overall Variability of Systolic Pressure in Different Strata**

|                                  | At risk    | Events    | Mean SBP          | VIM               | R <sup>2</sup> (%) |
|----------------------------------|------------|-----------|-------------------|-------------------|--------------------|
| <b>Total mortality</b>           |            |           |                   |                   |                    |
| All participants                 | 2944       | 401       | 1.18 (1.08–1.30)‡ | 1.00 (0.91–1.10)  | <0.01              |
| Women                            | 1494 (51%) | 173 (43%) | 1.35 (1.16–1.57)‡ | 1.01 (0.88–1.16)  | <0.01              |
| Men                              | 1450 (49%) | 228 (57%) | 1.09 (0.96–1.22)  | 1.00 (0.89–1.12)  | <0.01              |
| <60 years                        | 2365 (80%) | 116 (29%) | 1.19 (0.98–1.44)  | 1.02 (0.83–1.25)  | <0.01              |
| ≥60 years                        | 579 (20%)  | 285 (71%) | 1.17 (1.05–1.31)† | 1.02 (0.91–1.13)  | <0.01              |
| No history of CVD                | 2739 (93%) | 310 (77%) | 1.21 (1.08–1.35)‡ | 1.02 (0.91–1.15)  | <0.01              |
| History of CVD                   | 205 (7%)   | 91 (23%)  | 1.01 (0.80–1.27)  | 0.92 (0.78–1.08)  | 0.20               |
| Untreated                        | 2578 (88%) | 291 (73%) | 1.11 (0.99–1.25)  | 0.97 (0.87–1.10)  | <0.01              |
| Treated                          | 366 (12%)  | 110 (27%) | 1.41 (1.18–1.67)‡ | 1.09 (0.95–1.25)  | 0.20               |
| Normotensive                     | 2227 (76%) | 182 (45%) | 1.19 (0.93–1.54)  | 0.94 (0.81–1.10)  | <0.01              |
| Hypertensive                     | 717 (24%)  | 219 (55%) | 1.21 (1.06–1.39)† | 1.03 (0.92–1.16)  | <0.01              |
| <b>All cardiovascular events</b> |            |           |                   |                   |                    |
| All participants                 | 2944       | 311       | 1.26 (1.12–1.41)‡ | 1.05 (0.96–1.15)  | <0.01              |
| Women                            | 1494 (51%) | 130 (42%) | 1.43 (1.21–1.69)§ | 1.21 (1.06–1.39)† | 0.40               |
| Men                              | 1450 (49%) | 180 (58%) | 1.16 (0.99–1.36)  | 0.96 (0.84–1.09)  | 0.10               |
| <60 years                        | 2365 (80%) | 127 (41%) | 1.27 (1.04–1.55)* | 1.02 (0.87–1.19)  | <0.01              |
| ≥60 years                        | 579 (20%)  | 184 (59%) | 1.25 (1.09–1.44)† | 1.11 (0.98–1.25)  | 0.40               |
| No history of CVD                | 2739 (93%) | 236 (76%) | 1.37 (1.21–1.56)§ | 1.08 (0.96–1.21)  | 0.10               |
| History of CVD                   | 205 (7%)   | 75 (24%)  | 0.97 (0.76–1.25)  | 1.04 (0.91–1.19)  | <0.01              |
| Untreated                        | 2578 (88%) | 223 (72%) | 1.21 (1.11–1.49)‡ | 0.99 (0.87–1.12)  | <0.01              |
| Treated                          | 366 (12%)  | 88 (28%)  | 1.20 (1.00–1.43)* | 1.21 (1.06–1.38)† | 1.00               |
| Normotensive                     | 2227 (76%) | 143 (46%) | 1.31 (0.99–1.74)  | 1.03 (0.89–1.19)  | <0.01              |
| Hypertensive                     | 717 (24%)  | 168 (54%) | 1.15 (0.99–1.33)  | 1.07 (0.95–1.20)  | 0.10               |

Systolic blood pressure (SBP) level and variability independent of the mean (VIM) were based on 10 blood pressure readings, i.e., 5 consecutive blood pressure readings at each of 2 home visits, 2-4 weeks apart. CVD indicates cardiovascular disease. The R<sup>2</sup> statistic is a measure for the refinement of the risk prediction by adding VIM to models already including mean SBP and other covariables. Hypertension was a blood pressure (average of 10 readings) equal to or exceeding 140 mm Hg systolic or 90 mm Hg diastolic or use of antihypertensive drugs. Significance of the hazard ratios: \* P≤0.05; † P≤0.01; ‡ P≤0.001; and § P≤0.0001.

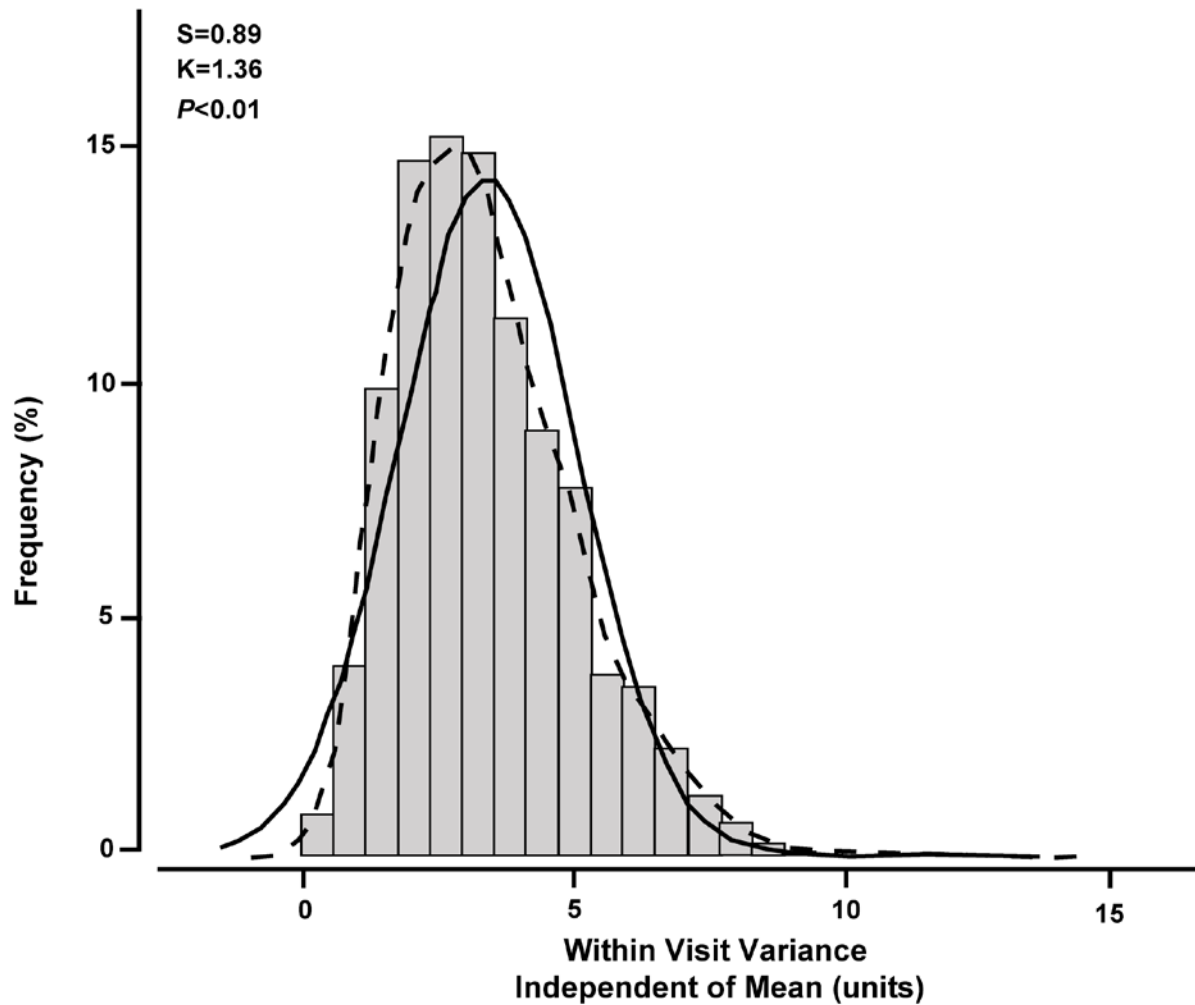

**Figure S1: Frequency Distribution of Within Visit Variability of Systolic Blood Pressure Independent of the Mean**

Within visit variability was computed for both sets of 5 blood pressure readings at a single visit and the so obtained parameters expressing variability were averaged over the 2 home visits. S and K are the coefficients of skewness and kurtosis, respectively; the *P* value is for departure of the actually observed distribution (full line) from normality (dotted line).



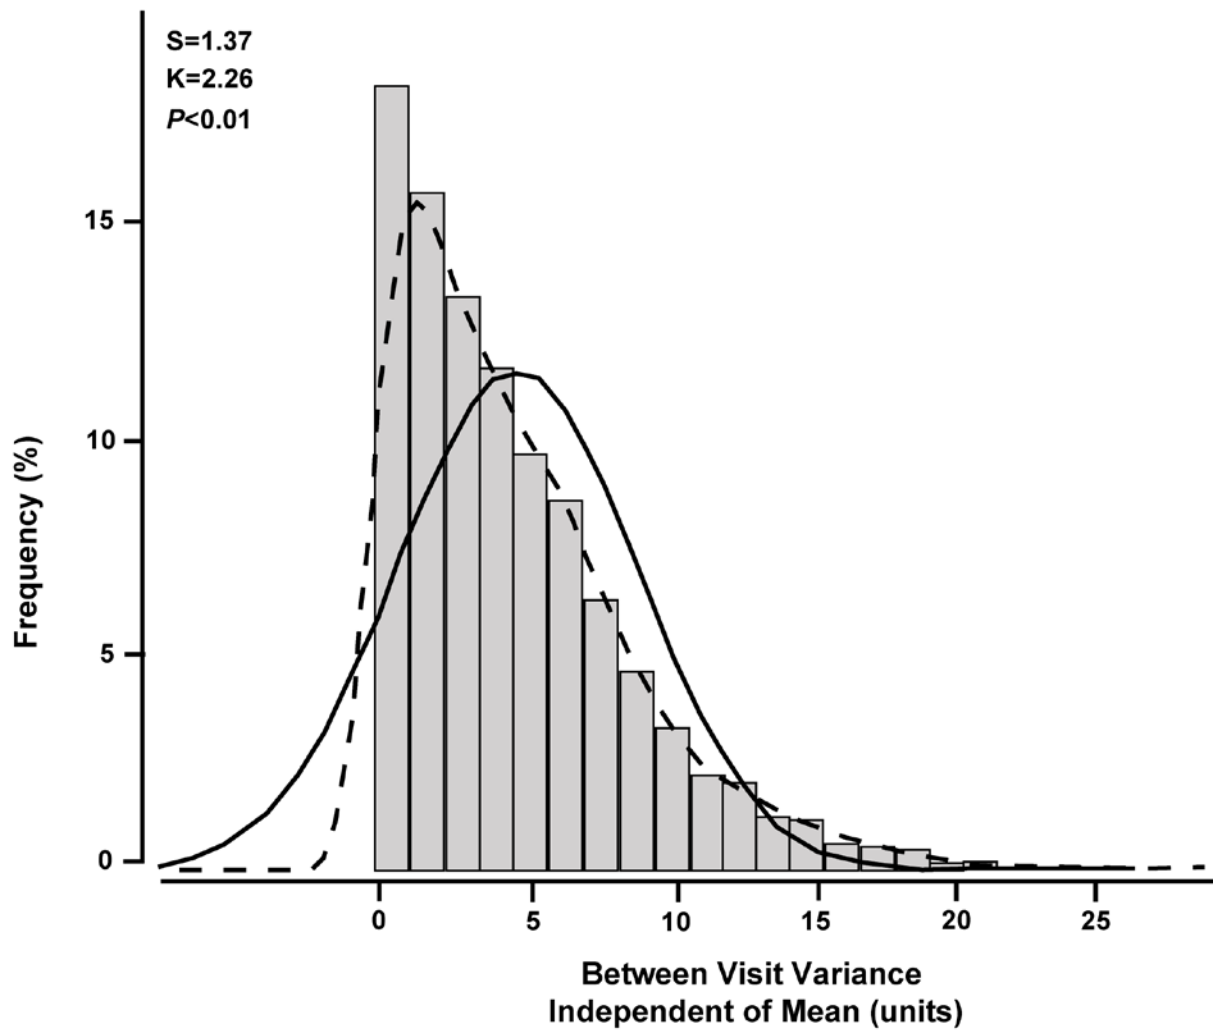

**Figure S2: Frequency Distribution of Between Visit Variability of Systolic Blood Pressure Independent of the Mean**

Between visit variability considered the variability (difference) between the mean blood pressure values at the 2 home visits.  $S$  and  $K$  are the coefficients of skewness and kurtosis, respectively; the  $P$  value is for departure of the actually observed distribution (full line) from normality (dotted line).
